# Supplementary material for: Predictors of Psychological Distress in Women with Endometriosis during the COVID-19 Pandemic
Source: MDPI journal article supplement (doi:10.3390/ijerph19084927), 2022-04-18
Supplement: s1 [file s1]

**Supplementary Table S1:** Mental scores by sample characteristics of previous publications.

| Participant sample | Values      | Representative survey of the German population [20] | Representative survey of the German population [34] |                        |                              |                              | German patients with fibromyalgia [35] |
|--------------------|-------------|-----------------------------------------------------|-----------------------------------------------------|------------------------|------------------------------|------------------------------|----------------------------------------|
|                    |             |                                                     | No chronic pain                                     | Chronic localized pain | Chronic oligo-localized pain | Chronic multi-localized pain |                                        |
| <b>PHQ-2</b>       | M (SD)<br>N | 0.94 (1.20)<br>5010                                 | 0.47 (0.82)<br>1684                                 | 0.79 (0.96)<br>222     | 1.08 (1.13)<br>458           | 1.97 (1.49)<br>146           | 3.0 (1.7)<br>1620                      |
| <b>GAD-2</b>       | M (SD)<br>N | 0.82 (1.10)<br>5027                                 | 0.29 (0.69)<br>1684                                 | 0.51 (0.87)<br>222     | 0.73 (1.05)<br>458           | 1.38 (1.42)<br>146           | 2.9 (1.8)<br>1617                      |
| <b>PHQ-4</b>       | M (SD)<br>N | 1.76 (2.06)<br>5003                                 | n.a.<br>n.a.                                        | n.a.<br>n.a.           | n.a.<br>n.a.                 | n.a.<br>n.a.                 | 5.9 (3.2)<br>1617                      |

GAD-2 = Generalized Anxiety Disorder Scale; PHQ-2 = Patient Health Questionnaire for Depression; PHQ-4 = Patient Health Questionnaire for Depression and Anxiety; M = Mean; N = Number of women for which data were available; SD = standard deviation; n.a. = not available.
